# Supplementary material
Source: PubMed Central journal article supplement (PMC6209115)
Supplement: NIHMS1505581-supplement-Supplementary_material.pdf [file NIHMS1505581-supplement-Supplementary_material.pdf]

Supplementary material

Supplemental table I. Baseline characteristics of patients with and without a TTE obtained

|                              | TTE Collected |                | p-value |
|------------------------------|---------------|----------------|---------|
|                              | No<br>(n=69)  | Yes<br>(n=578) |         |
| Age                          | 72.8 ± 17.7   | 74 ± 13.7      | 0.581   |
| Gender (% Female)            | 37 (53.6%)    | 263 (45.5%)    | 0.201   |
| History of hypertension      | 48 (69.6%)    | 453 (78.4%)    | 0.098   |
| History of diabetes          | 16 (23.2%)    | 158 (27.3%)    | 0.463   |
| History of hyperlipidemia    | 37 (53.6%)    | 280 (48.4%)    | 0.416   |
| Coronary artery disease      | 13 (18.8%)    | 134 (23.2%)    | 0.416   |
| History of prior stroke      | 22 (31.9%)    | 134 (23.2%)    | 0.11    |
| Congestive heart failure     | 5 (7.2%)      | 81 (14%)       | 0.118   |
| Atrial Fibrillation          | 33 (47.8%)    | 315 (54.5%)    | 0.293   |
| Current smoking              | 10 (14.5%)    | 91 (15.7%)     | 0.787   |
| NIHSS scale                  | 5 (2-20)      | 7 (3-16.5)     | 0.699   |
| Known valvular heart disease | 0 (0%)        | 5 (0.8%)       | 1       |
| eGFR greater than 60         | 39 (56.5%)    | 337 (58.3%)    | 0.777   |
| Troponin positive            | 5 (8.2%)      | 65 (12.1%)     | 0.371   |
| Intravenous thrombolysis     | 21 (30.4%)    | 177 (30.6%)    | 0.974   |
| Mechanical thrombectomy      | 13 (18.8%)    | 132 (22.9%)    | 0.448   |
| 90-day modified Rankin scale | 5 (1-6)       | 3 (2-6)        | 0.429   |
| Stroke Subtype               |               |                | 0.057   |
| Cardioembolic                | 33 (47.8%)    | 315 (54.5%)    | 0.293   |
| Large Artery Atherosclerosis | 16 (23.2%)    | 150 (26%)      | 0.619   |
| Small Vessel Disease         | 14 (20.3%)    | 97 (16.8%)     | 0.465   |
| Other                        | 6 (8.7%)      | 16 (2.8%)      | 0.01    |

Supplemental Table II. Univariate analyses showing factors associated with TTE

changing management

|                              | TTE Changed Management |               | p-value |
|------------------------------|------------------------|---------------|---------|
|                              | No<br>(n=514)          | Yes<br>(n=64) |         |
| Age                          | 73.9 ± 13.7            | 74.9 ± 13.2   | 0.582   |
| Sex (% Female)               | 236 (45.9%)            | 27 (42.2%)    | 0.572   |
| Hypertension                 | 407 (79.2%)            | 46 (71.9%)    | 0.181   |
| Diabetes                     | 144 (28%)              | 14 (21.9%)    | 0.299   |
| Hyperlipidemia               | 256 (49.8%)            | 24 (37.5%)    | 0.063   |
| Coronary artery disease      | 120 (23.3%)            | 14 (21.9%)    | 0.793   |
| History of stroke            | 119 (23.2%)            | 15 (23.4%)    | 0.959   |
| Congestive heart failure     | 65 (12.6%)             | 16 (25%)      | 0.007   |
| Atrial fibrillation          | 270 (52.5%)            | 45 (70.3%)    | 0.007   |
| Current smoker               | 78 (15.2%)             | 13 (20.3%)    | 0.287   |
| NIHSS score                  | 7 (3-16)               | 8 (4-20)      | 0.134   |
| Troponin positive            | 45 (9.4%)              | 21 (33.9%)    | <0.001  |
| eGFR greater than 60         | 298 (58%)              | 39 (60.9%)    | 0.651   |
| Intravenous thrombolysis     | 161 (31.3%)            | 16 (25%)      | 0.301   |
| Mechanical Thrombectomy      | 115 (22.4%)            | 17 (26.6%)    | 0.457   |
| 90 Day mRs                   | 3 (2-6)                | 4 (2-6)       | 0.117   |
| Stroke Subtype               |                        |               | 0.064   |
| Cardioembolic                | 270 (52.5%)            | 45 (70.3%)    | 0.007   |
| Large Artery Atherosclerosis | 139 (27%)              | 11 (17.2%)    | 0.09    |
| Small Vessel Disease         | 90 (17.5%)             | 7 (10.9%)     | 0.185   |
| Other                        | 15 (2.9%)              | 1 (1.6%)      | 1       |
